# Supplementary material
Source: Springer Nature journal article supplement (https://www.springermedizin.de/resource/supplementary/12955_2006_267_MOESM3_ESM.pdf/9560030)

a) Daily Activities: Item 29 (bathing)

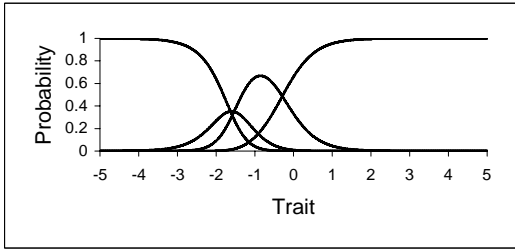

b) Item 37 (heavy chores)

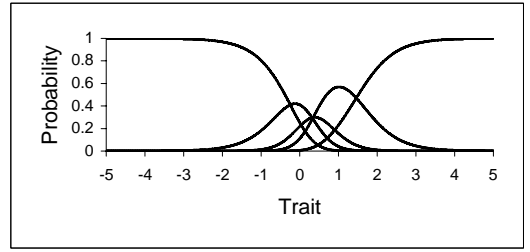

c) Walking: Item 11 (walking 20 yards)

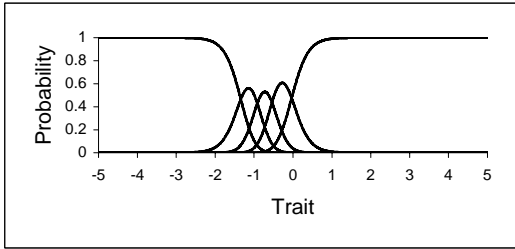

d) Item 18 (on feet for 4 hours)

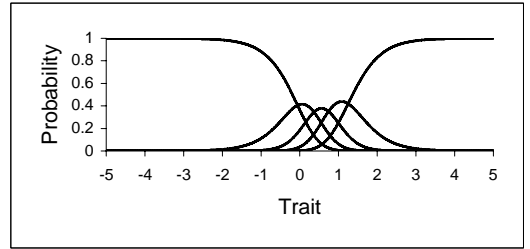

e) Handling Objects: Item 23 (brushing teeth)

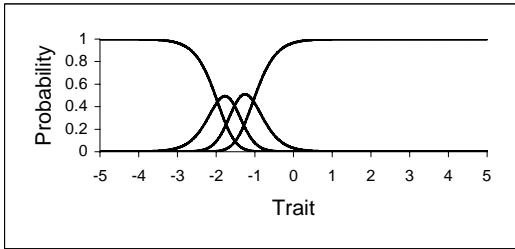

f) Item 50 (heavy furniture)

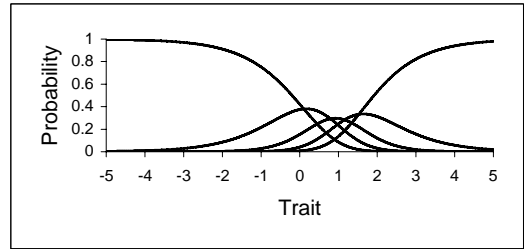

g) Pain or Discomfort: Item 18 (grooming)

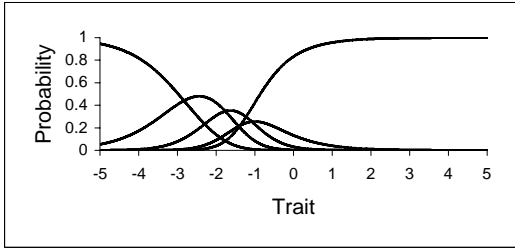

h) Item 4 (normal work)

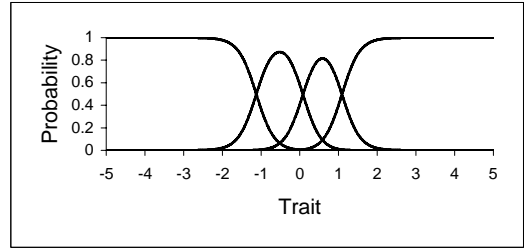

i) Feelings: Item 33 (complete failure)

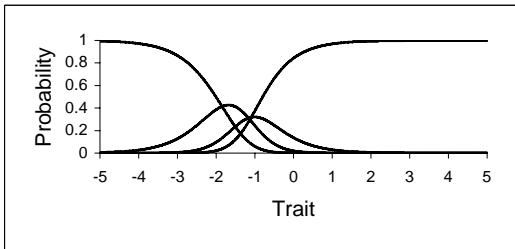

j) Item 26 (elated or overjoyed)

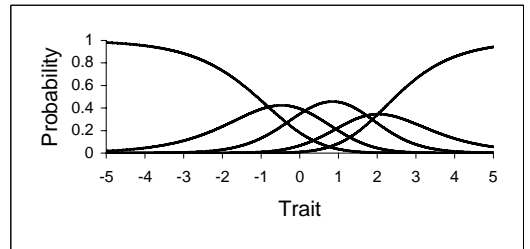

Supplement: MOESM3 [file 9560030]
